# Supplementary material for: Antimicrobial Activity of Silver Nanoparticles Stabilized by Liposoluble Extract of Artemisia terrae-albae
Source: MDPI journal article supplement (doi:10.3390/pr11103041), 2023-10-23
Supplement: s1 [file s1]

## Supplementary information

# Antimicrobial Activity of Silver Nanoparticles Stabilized by Liposoluble Extract of *Artemisia terrae-albae*

Moldyr A. Dyusebaeva <sup>1,†</sup>, Dmitriy A. Berillo <sup>2,\*,†</sup>, Alya E. Berganayeva <sup>3</sup>, Gulzat E. Berganayeva <sup>1</sup>, Nailya A. Ibragimova <sup>3</sup>, Saltanat M. Jumabayeva <sup>3</sup>, Nurbolat Z. Kudaibergenov <sup>1</sup>, Fatima M. Kanapiyeva <sup>1</sup>, Aray A. Kirgizbayeva <sup>4</sup> and Gulzira K. Vassilina <sup>1</sup>

<sup>1</sup> Faculty of Chemistry and Chemical Technology, Al-Farabi Kazakh National University, 71 Al-Farabi Ave., Almaty 050042, Kazakhstan; moldyr.dyusebaeva@mail.ru (M.A.D.); gulzat-bakyt@mail.ru (G.E.B.); nurbolat.kudaibergenov@kaznu.edu.kz (N.Z.K.); fatima31@mail.ru (F.M.K.); v\_gulzira@mail.ru (G.K.V.)

<sup>2</sup> Department of Chemistry and Biochemical Engineering, Satbayev University, Satbayev av. 22, Almaty 050013, Kazakhstan

<sup>3</sup> Scientific Center for Anti-Infectious Drugs, 75A Al-Farabi Ave., Almaty 050060, Kazakhstan; aberganayeva@bk.ru (A.E.B.); nailya.73@mail.ru (N.A.I.); salta\_albann@mail.ru (S.M.J.)

<sup>4</sup> Department of Biochemistry, Asfendiyarov Kazakh National Medical University, 94 Tole bi Ave., Almaty 050012, Kazakhstan; aray\_100@mail.ru

\* Correspondence: d.berillo@satbayev.university

† These authors contributed equally to this work.

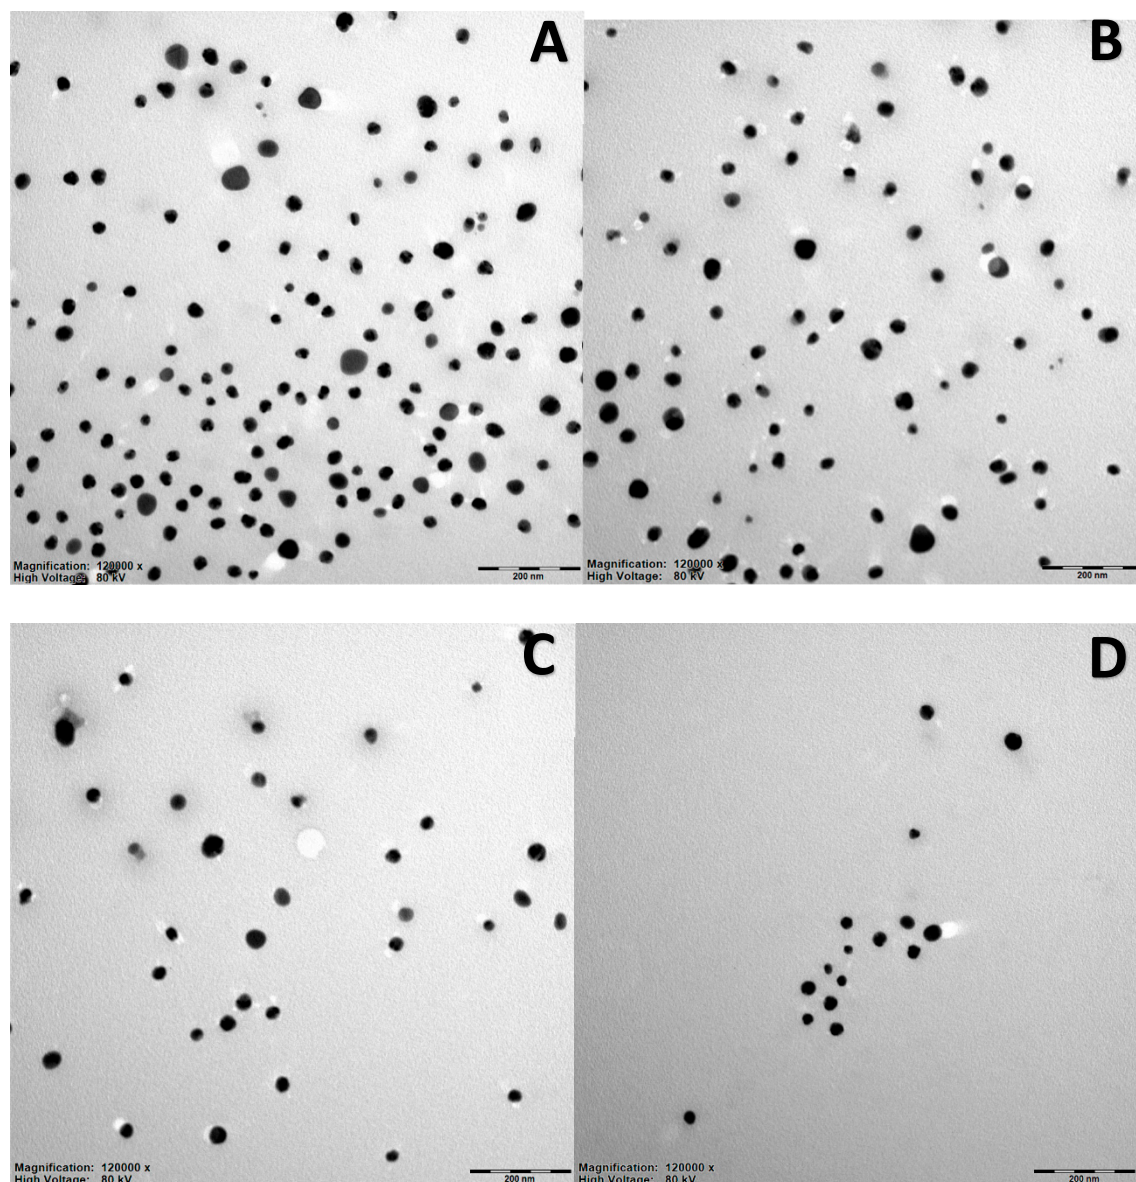

**Figure S1.** TEM photograph: A, B, C, D) AgNPs@EtAc *Art extract* x40

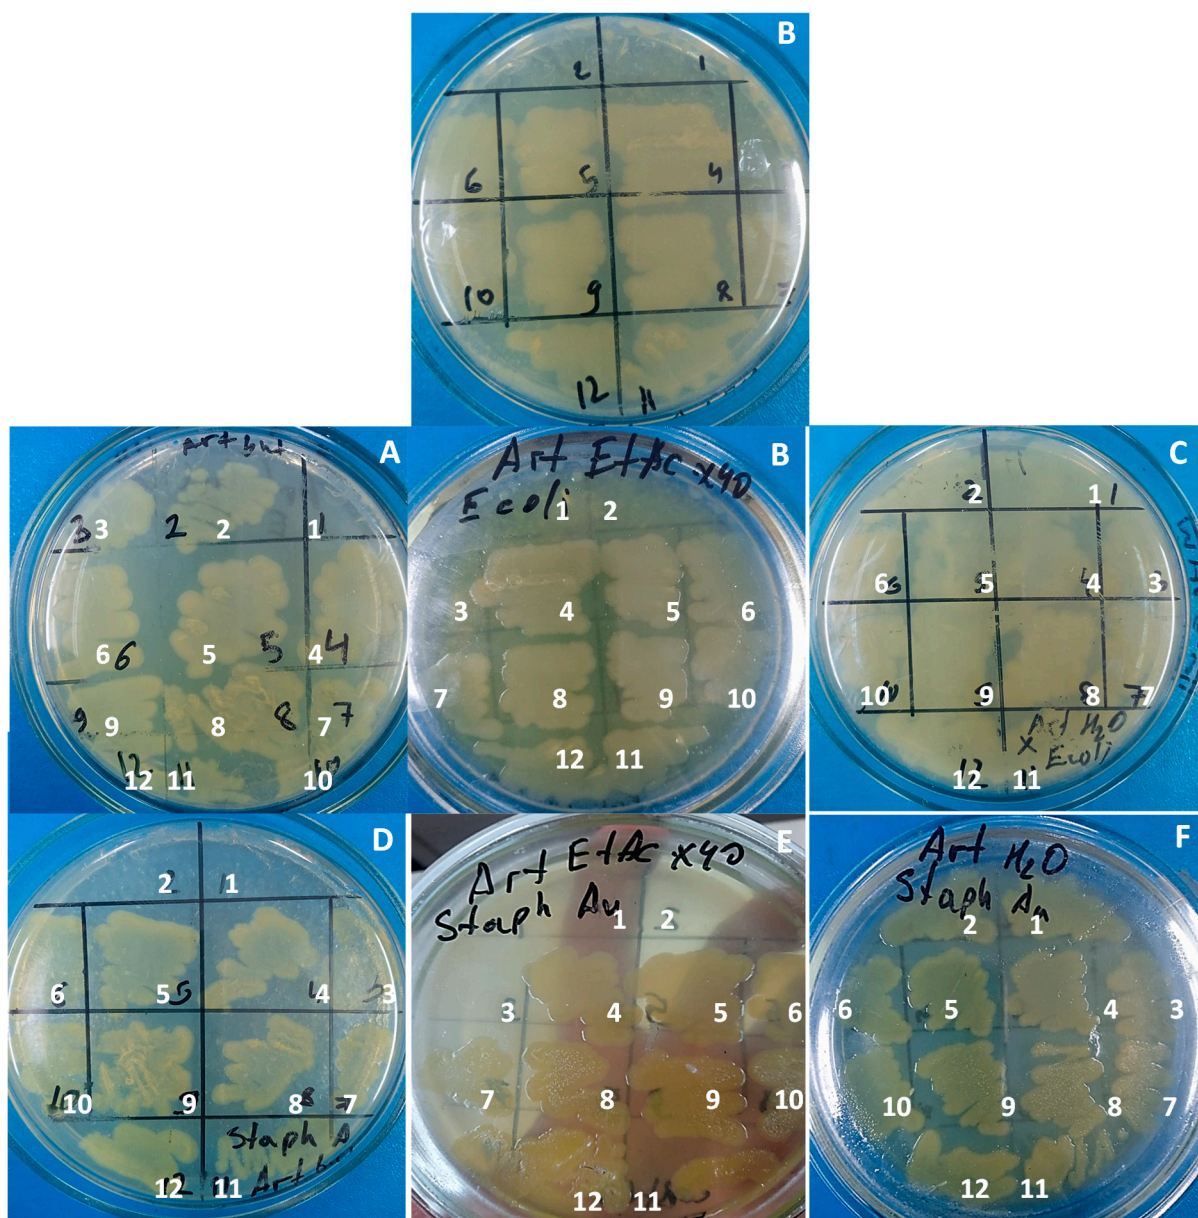

**Figure S2.** Bacterial growth on agar plate after exposure to Art extract obtained using different solvents: A) Art butanol extract x40 in 50% ethanol against of *E. coli* (ATCC 8739); B) Art EtAc x40 in 50% ethanol against of *E. coli* (ATCC 8739); C) Art aq. extract x20 against of *E. coli* (ATCC 8739); D) Art butanol extract x40 in 50% ethanol ; E) Art EtAc extract x40 in 50% ethanol against of *S. aureus* (ATCC 25923); F) Art aq. extract x20 against of *S. aureus* (ATCC 25923)
